# Supplementary material
Source: HighWire-hosted journal article supplement (https://tsaco.bmj.com/content/3/1/e000153)
Supplement: inline-supplementary-material-1 [file inline-supplementary-material-1.docx]

APPENDIX A: Search Strategy

Search: ((((sports equipment[mesh] OR sports[mesh] OR sports[all fields] OR sport[all fields])))) AND (((((((prevent[tw] OR prevents[tw] OR prevention[tw] OR pc[sh] OR risk[tw] OR risks[tw] OR incidence[tw] OR incidence[mesh] OR risk factors[mesh] OR risk assessment[mesh]))) AND (brain concussion[mesh] OR "Craniocerebral Trauma"[Majr] OR concussion[tw] OR concussions[tw] OR (mild[tiab] AND (tbi[tiab] OR traumatic brain injur*[tw])))))))

Filters: Case Reports, Comparative Study, Clinical Trial, Controlled Clinical Trial, Evaluation Studies, Guideline, Meta-Analysis, Multicenter Study, Observational Study, Practice Guideline, Randomized Controlled Trial, Review, Systematic Reviews, Validation Studies, From 1985/01
